# Supplementary material for: Sulfonylurea Is Associated With Higher Risks of Ventricular Arrhythmia or Sudden Cardiac Death Compared With Metformin: A Population‐Based Cohort Study
Source: PubMed Central journal article supplement (PMC9683657; doi:10.1161/jaha.122.026289), 2022-09-14
Supplement: JAH3-11-e026289-s001.pdf [file JAH3-11-e026289-s001.pdf]

# **SUPPLEMENTAL MATERIAL**

**Table S1. International Classification of Diseases 9 (ICD-9) codes used for classifying outcomes and comorbidities.**

| <b>Medical condition</b>              | <b>ICD-9 codes</b>                                                    |
|---------------------------------------|-----------------------------------------------------------------------|
| <b>Outcome</b>                        |                                                                       |
| VA/SCD                                | 427.01,427.40-427.59                                                  |
| <b>Comorbidities</b>                  |                                                                       |
| Peripheral vascular disease           | 250.7                                                                 |
| Ischemic stroke                       | 433.01,433.11,433.21,433.31, 433.81, 433.91, 434.01, 434.11, 435, 436 |
| Atrial fibrillation                   | 427.31, 429.4                                                         |
| Heart failure                         | 428.00-428.99                                                         |
| Prior VA/SCD                          | 427.01,427.40-427.59                                                  |
| Intracranial hemorrhage               | 430,431,432.0,432.1,432.9,852.0-852.1,852.2-852.3,852.4-852.5,853.0   |
| Coronary heart disease                | 410.0-411.9,413.0-414.9                                               |
| Hypertension                          | 401.9                                                                 |
| Chronic Obstructive Pulmonary Disease | 491.00-492.99                                                         |
| Cardiomyopathy                        | 425.0-425.9                                                           |
| Valvular disease                      | 424.0-424.4                                                           |

VA/SCD: Ventricular arrhythmia or sudden cardiac death

**Table S2. Baseline characteristics of metformin and sulfonylurea users with missing values for HbA1c.**

| <b>Characteristics</b>                                    | <b>Metformin (N=31984)</b> | <b>Sulfonylurea (N=22277)</b> |
|-----------------------------------------------------------|----------------------------|-------------------------------|
| <b><i>Demographics</i></b>                                |                            |                               |
| Male, N (%)                                               | 13533 (42.3%)              | 10628 (47.7%)                 |
| Baseline age, years                                       | 64.84±11.67                | 69.17±11.87                   |
| Follow up duration since type 2 diabetes diagnosis, years | 4.77±2.55                  | 4.83±2.56                     |
| <b><i>Comorbidities</i></b>                               |                            |                               |
| Peripheral vascular disease, N (%)                        | 6 (0.0%)                   | 4 (0.0%)                      |
| Ischemic stroke, N (%)                                    | 611 (1.9%)                 | 704 (3.2%)                    |
| Atrial fibrillation, N (%)                                | 379 (1.2%)                 | 573 (2.6%)                    |
| Heart failure, N (%)                                      | 462 (1.4%)                 | 804 (3.6%)                    |
| Prior VA/SCD, N (%)                                       | 1 (0.0%)                   | 6 (0.0%)                      |
| Intracranial hemorrhage, N (%)                            | 273 (0.9%)                 | 318 (1.4%)                    |
| Coronary heart disease, N (%)                             | 1189 (3.7%)                | 1295 (5.8%)                   |
| Hypertension, N (%)                                       | 5190 (16.2%)               | 4703 (21.1%)                  |
| Chronic obstructive pulmonary disease, N (%)              | 68 (0.2%)                  | 87 (0.4%)                     |
| <b><i>Medications</i></b>                                 |                            |                               |
| ACE inhibitors, N (%)                                     | 12114 (37.9%)              | 8060 (36.2%)                  |
| Beta blockers, N (%)                                      | 10609 (33.2%)              | 6913 (31.0%)                  |
| Calcium channel blockers, N (%)                           | 13250 (41.4%)              | 9617 (43.2%)                  |
| Diuretics, N (%)                                          | 5473 (17.1%)               | 4185 (18.8%)                  |
| Insulin, N (%)                                            | 1547 (4.8%)                | 657 (2.9%)                    |
| Thiazolidinediones, N (%)                                 | 36 (0.1%)                  | 29 (0.1%)                     |
| DPP4 inhibitors, N (%)                                    | 7 (0.0%)                   | 4 (0.0%)                      |
| GLP-1 agonists, N (%)                                     | 0 (0.0%)                   | 0 (0.0%)                      |

**Table S3. Baseline characteristics of metformin and sulfonylurea users stratified by insulin versus insulin nonusers after 1:1 propensity score matching.**

| Characteristics                                           | Insulin users          |                           | Insulin nonusers        |                            |
|-----------------------------------------------------------|------------------------|---------------------------|-------------------------|----------------------------|
|                                                           | Metformin<br>(N=2,429) | Sulfonylurea<br>(N=2,501) | Metformin<br>(N=14,167) | Sulfonylurea<br>(N=14,095) |
| <b>Demographics</b>                                       |                        |                           |                         |                            |
| Male , N (%)                                              | 1303 (53.6%)           | 1359 (54.3%)              | 6608 (46.6%)            | 6913 (49.0%)               |
| Baseline age, years                                       | 70.73±9.83             | 71.11±10.86               | 67.70±11.00             | 69.33±11.41                |
| Follow up duration since type 2 diabetes diagnosis, years | 4.95±2.49              | 4.93±2.56                 | 4.92±2.55               | 4.93±2.55                  |
| <b>Comorbidities</b>                                      |                        |                           |                         |                            |
| Peripheral vascular disease, N (%)                        | 29 (1.2%)              | 27 (1.1%)                 | 0 (0.0%)                | 0 (0.0%)                   |
| Ischemic stroke, N (%)                                    | 156 (6.4%)             | 204 (8.2%)                | 703 (5.0%)              | 782 (5.5%)                 |
| Atrial fibrillation, N (%)                                | 138 (5.7%)             | 194 (7.8%)                | 596 (4.2%)              | 772 (5.5%)                 |
| Heart failure, N (%)                                      | 238 (9.8%)             | 382 (15.3%)               | 557 (3.9%)              | 877 (6.2%)                 |
| Prior VA/SCD, N (%)                                       | 0 (0.0%)               | 3 (0.1%)                  | 4 (0.0%)                | 4 (0.0%)                   |
| Intracranial hemorrhage, N (%)                            | 47 (1.9%)              | 60 (2.4%)                 | 259 (1.8%)              | 302 (2.1%)                 |
| Coronary heart disease, N (%)                             | 441 (18.2%)            | 537 (21.5%)               | 1747 (12.3%)            | 1992 (14.1%)               |
| Hypertension, N (%)                                       | 1149 (47.3%)           | 1359 (54.3%)              | 4755 (33.6%)            | 5178 (36.7%)               |
| Chronic obstructive pulmonary disease, N (%)              | 11 (0.5%)              | 18 (0.7%)                 | 47 (0.3%)               | 72 (0.5%)                  |
| <b>Medications</b>                                        |                        |                           |                         |                            |
| ACE inhibitors, N (%)                                     | 1827 (75.2%)           | 1518 (60.7%)              | 7021 (49.6%)            | 7507 (53.3%)               |
| Beta blockers, N (%)                                      | 980 (40.3%)            | 1238 (49.5%)              | 5858 (41.3%)            | 5599 (39.7%)               |
| Calcium channel blockers, N (%)                           | 1335 (55.0%)           | 1450 (58.0%)              | 6194 (43.7%)            | 6360 (45.1%)               |
| Diuretics, N (%)                                          | 928 (38.2%)            | 1188 (47.5%)              | 2833 (20.0%)            | 3104 (22.0%)               |
| Thiazolidinediones, N (%)                                 | 95 (3.9%)              | 41 (1.6%)                 | 74 (0.5%)               | 135 (1.0%)                 |
| DPP4 inhibitors, N (%)                                    | 6 (0.2%)               | 3 (0.1%)                  | 6 (0.0%)                | 7 (0.0%)                   |
| GLP-1 agonists, N (%)                                     | 0 (0.0%)               | 0 (0.0%)                  | 0 (0.0%)                | 0 (0.0%)                   |
| <b>Laboratory tests</b>                                   |                        |                           |                         |                            |
| HbA1c, %                                                  | 7.44±1.42              | 7.44±1.45                 | 7.45±1.44               | 7.45±1.45                  |

Continuous variables were expressed as mean ± standard deviation. VA/SCD: Ventricular arrhythmia or sudden cardiac death; ACE: angiotensin-converting enzyme; DPP4: dipeptidyl-peptidase 4; GLP-1: glucagon-like peptide 1.

**Table S4. Baseline characteristics of metformin and sulfonylurea users stratified by history of coronary heart disease (CHD) after 1:1 propensity score matching.**

| Characteristics                                           | With CHD               |                           | Without CHD             |                            |
|-----------------------------------------------------------|------------------------|---------------------------|-------------------------|----------------------------|
|                                                           | Metformin<br>(N=2,188) | Sulfonylurea<br>(N=2,529) | Metformin<br>(N=14,408) | Sulfonylurea<br>(N=14,067) |
| <b>Demographics</b>                                       |                        |                           |                         |                            |
| Male, N (%)                                               | 1144 (52.3%)           | 1376 (54.4%)              | 6767 (47.0%)            | 6896 (49.0%)               |
| Baseline age, years                                       | 71.03±9.72             | 72.46±9.87                | 67.70±10.99             | 69.08±11.52                |
| Follow up duration since type 2 diabetes diagnosis, years | 5.06±2.51              | 5.02±2.55                 | 4.90±2.55               | 4.91±2.55                  |
| <b>Comorbidities</b>                                      |                        |                           |                         |                            |
| Peripheral vascular disease, N (%)                        | 7 (0.3%)               | 10 (0.4%)                 | 22 (0.2%)               | 17 (0.1%)                  |
| Ischemic stroke, N (%)                                    | 153 (7.0%)             | 167 (6.6%)                | 706 (4.9%)              | 819 (5.8%)                 |
| Atrial fibrillation, N (%)                                | 202 (9.2%)             | 294 (11.6%)               | 532 (3.7%)              | 672 (4.8%)                 |
| Heart failure, N (%)                                      | 309 (14.1%)            | 583 (23.1%)               | 486 (3.4%)              | 676 (4.8%)                 |
| Prior VA/SCD, N (%)                                       | 4 (0.2%)               | 5 (0.2%)                  | 0 (0.0%)                | 2 (0.0%)                   |
| Intracranial hemorrhage, N (%)                            | 52 (2.4%)              | 63 (2.5%)                 | 254 (1.8%)              | 299 (2.1%)                 |
| Hypertension, N (%)                                       | 1313 (60.0%)           | 1558 (61.6%)              | 4591 (31.9%)            | 4979 (35.4%)               |
| Chronic obstructive pulmonary disease, N (%)              | 10 (0.5%)              | 27 (1.1%)                 | 48 (0.3%)               | 63 (0.4%)                  |
| <b>Medications</b>                                        |                        |                           |                         |                            |
| ACE inhibitors, N (%)                                     | 1429 (65.3%)           | 1689 (66.8%)              | 7419 (51.5%)            | 7336 (52.2%)               |
| Beta blockers, N (%)                                      | 1568 (71.7%)           | 1686 (66.7%)              | 5270 (36.6%)            | 5151 (36.6%)               |
| Calcium channel blockers, N (%)                           | 1071 (48.9%)           | 1334 (52.7%)              | 6458 (44.8%)            | 6476 (46.0%)               |
| Diuretics, N (%)                                          | 632 (28.9%)            | 976 (38.6%)               | 3129 (21.7%)            | 3316 (23.6%)               |
| Insulin, N (%)                                            | 441 (20.2%)            | 537 (21.2%)               | 1988 (13.8%)            | 1964 (14.0%)               |
| Thiazolidinediones, N (%)                                 | 15 (0.7%)              | 17 (0.7%)                 | 154 (1.1%)              | 159 (1.1%)                 |
| DPP4 inhibitors, N (%)                                    | 1 (0.0%)               | 3 (0.1%)                  | 11 (0.0%)               | 7 (0.0%)                   |
| GLP-1 agonists, N (%)                                     | 0 (0.0%)               | 0 (0.0%)                  | 0 (0.0%)                | 0 (0.0%)                   |
| <b>Laboratory tests</b>                                   |                        |                           |                         |                            |
| HbA1c, %                                                  | 7.50±1.42              | 7.51±1.50                 | 7.44±1.44               | 7.44±1.45                  |

Continuous variables were expressed as mean ± standard deviation. VA/SCD: Ventricular arrhythmia or sudden cardiac death; ACE: angiotensin-converting enzyme; DPP4: dipeptidyl-peptidase 4; GLP-1: glucagon-like peptide 1.

**Table S5. Baseline characteristics of individual sulfonylurea users after 1:1 propensity score matching.**

| <b>Characteristics</b>                                    | <b>Glicazide<br/>(N=10116)</b> | <b>Glipizide<br/>(N=399)</b> | <b>Tolbutamide<br/>(N=302)</b> | <b>Glibenclamide<br/>(N=1216)</b> | <b>Glimepiride<br/>(N=180)</b> |
|-----------------------------------------------------------|--------------------------------|------------------------------|--------------------------------|-----------------------------------|--------------------------------|
| <b><i>Demographics</i></b>                                |                                |                              |                                |                                   |                                |
| Male, N (%)                                               | 4942 (48.9%)                   | 200 (50.1%)                  | 144 (47.7%)                    | 633 (52.1%)                       | 97 (53.9%)                     |
| Baseline age, years                                       | 70.05±11.40                    | 72.66±11.77                  | 73.34±11.29                    | 67.36±10.30                       | 69.42±11.05                    |
| Follow up duration since type 2 diabetes diagnosis, years | 4.94±2.54                      | 5.01±2.59                    | 4.98±2.56                      | 5.06±2.67                         | 4.61±2.57                      |
| <b><i>Comorbidities</i></b>                               |                                |                              |                                |                                   |                                |
| Peripheral vascular disease, N (%)                        | 0 (0.0%)                       | 0 (0.0%)                     | 0 (0.0%)                       | 0 (0.0%)                          | 0 (0.0%)                       |
| Ischemic stroke, N (%)                                    | 648 (6.4%)                     | 27 (6.8%)                    | 20 (6.6%)                      | 32 (2.6%)                         | 9 (5.0%)                       |
| Atrial fibrillation, N (%)                                | 622 (6.1%)                     | 22 (5.5%)                    | 32 (10.6%)                     | 36 (3.0%)                         | 3 (1.7%)                       |
| Heart failure, N (%)                                      | 729 (7.2%)                     | 33 (8.3%)                    | 34 (11.3%)                     | 28 (2.3%)                         | 10 (5.6%)                      |
| Prior VA/SCD, N (%)                                       | 4 (0.0%)                       | 0 (0.0%)                     | 0 (0.0%)                       | 0 (0.0%)                          | 0 (0.0%)                       |
| Intracranial hemorrhage, N (%)                            | 244 (2.4%)                     | 13 (3.3%)                    | 6 (2.0%)                       | 19 (1.6%)                         | 4 (2.2%)                       |
| Coronary heart disease, N (%)                             | 1492 (14.7%)                   | 71 (17.8%)                   | 60 (19.9%)                     | 143 (11.8%)                       | 21 (11.7%)                     |
| Hypertension, N (%)                                       | 3968 (39.2%)                   | 170 (42.6%)                  | 187 (61.9%)                    | 355 (29.2%)                       | 60 (33.3%)                     |
| Chronic obstructive pulmonary disease, N (%)              | 69 (0.7%)                      | 0 (0.0%)                     | 1 (0.3%)                       | 1 (0.1%)                          | 0 (0.0%)                       |
| <b><i>Medications</i></b>                                 |                                |                              |                                |                                   |                                |
| ACE inhibitors, N (%)                                     | 5457 (53.9%)                   | 227 (56.9%)                  | 167 (55.3%)                    | 587 (48.3%)                       | 116 (64.4%)                    |
| Beta blockers, N (%)                                      | 4025 (39.8%)                   | 173 (43.4%)                  | 163 (54.0%)                    | 427 (35.1%)                       | 91 (50.6%)                     |
| Calcium channel blockers, N (%)                           | 4672 (46.2%)                   | 203 (50.9%)                  | 214 (70.9%)                    | 494 (40.6%)                       | 102 (56.7%)                    |
| Diuretics, N (%)                                          | 2362 (23.3%)                   | 119 (29.8%)                  | 126 (41.7%)                    | 182 (15.0%)                       | 64 (35.6%)                     |
| Insulin, N (%)                                            | 495 (4.9%)                     | 37 (9.3%)                    | 36 (11.9%)                     | 31 (2.5%)                         | 44 (24.4%)                     |
| Thiazolidinediones, N (%)                                 | 81 (0.8%)                      | 8 (2.0%)                     | 1 (0.3%)                       | 7 (0.6%)                          | 12 (6.7%)                      |
| DPP4 inhibitors, N (%)                                    | 3 (0.0%)                       | 0 (0.0%)                     | 0 (0.0%)                       | 0 (0.0%)                          | 0 (0.0%)                       |
| GLP-1 agonists, N (%)                                     | 0 (0.0%)                       | 0 (0.0%)                     | 0 (0.0%)                       | 0 (0.0%)                          | 0 (0.0%)                       |

| <i>Laboratory tests</i> |           |           |           |           |           |
|-------------------------|-----------|-----------|-----------|-----------|-----------|
| HbA1c, %                | 7.45±1.46 | 7.54±1.56 | 7.62±1.52 | 7.40±1.44 | 7.53±1.47 |

VA/SCD: Ventricular arrhythmia or sudden cardiac death; ACE: angiotensin-converting enzyme; DPP4: dipeptidyl-peptidase 4; GLP-1: glucagon-like peptide

**Figure S1. Covariate balance before and after propensity score matching.**

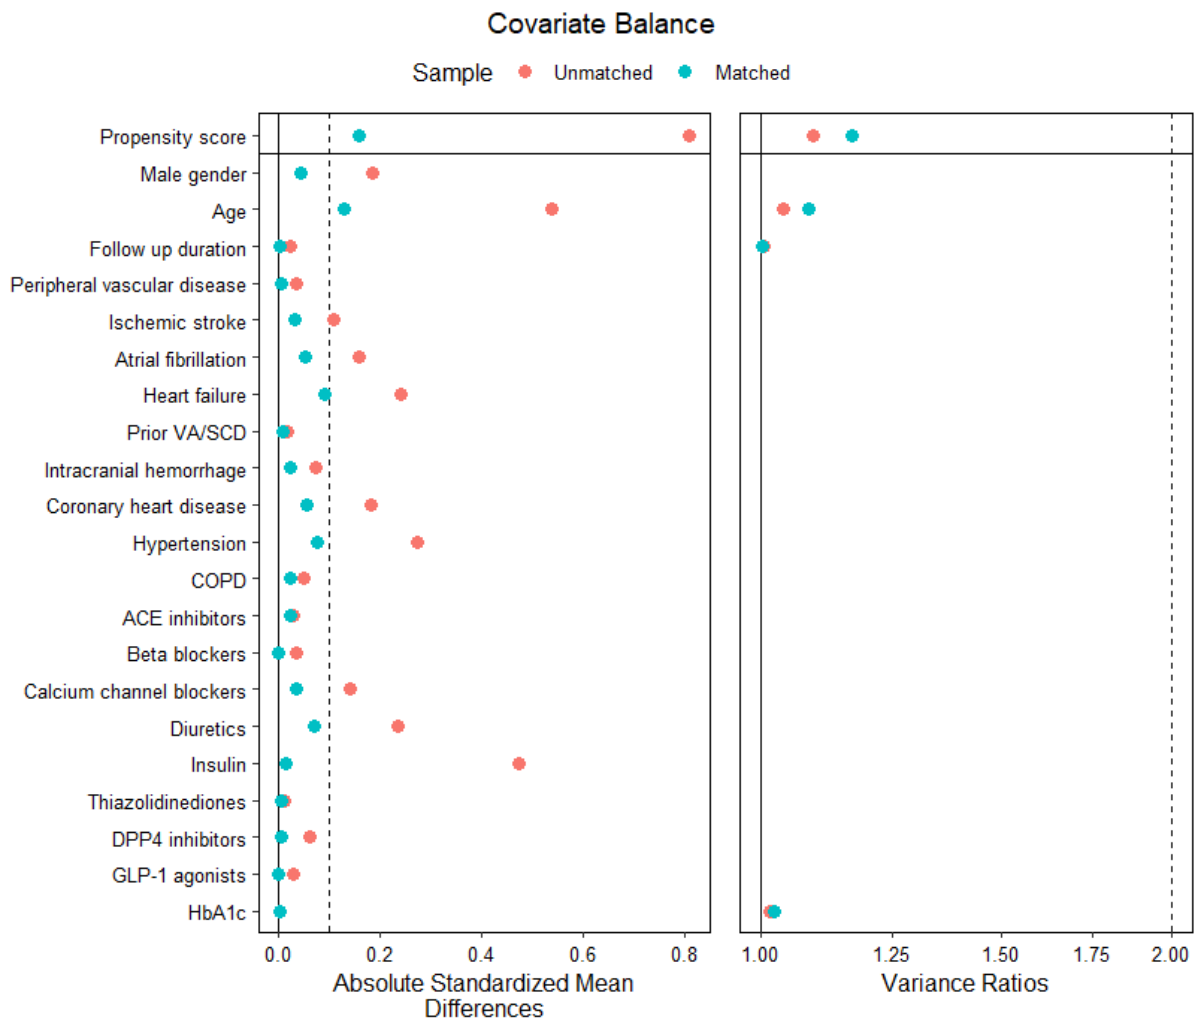

VA/SCD: Ventricular arrhythmia or sudden cardiac death; ACE: angiotensin-converting enzyme; COPD: chronic obstructive pulmonary disease; DPP4: dipeptidyl-peptidase 4; GLP-1: glucagon-like peptide 1.
